# Supplementary material for: Propylene Glycol and Vegetable Glycerin E-cigarette Aerosols Disrupt Mucociliary Function and Cause Cytotoxicity in Human Airway Epithelium
Source: Research Square preprint supplement (doi:10.21203/rs.3.rs-7040096/v1), 2025-09-25
Supplement: Supplementary file 1 [file 1d9c3e6e4505fbce58f6f81f.pdf]

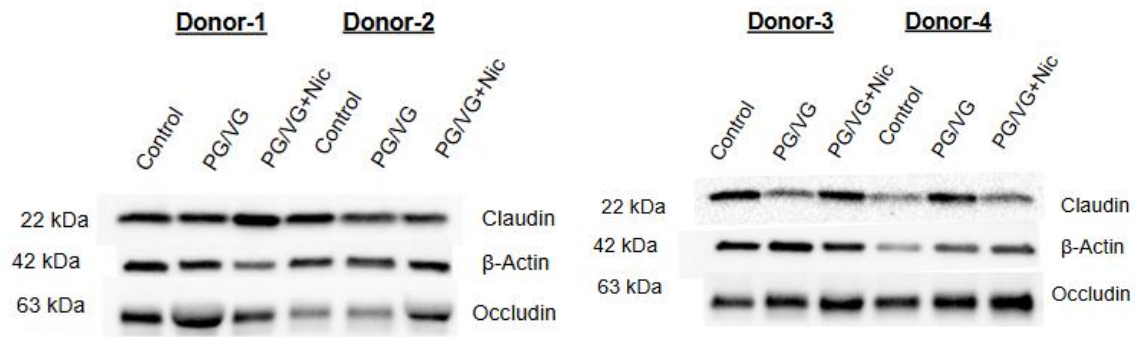

**Supplementary Figure 1. Protein expression of Claudin and Occludin from two donors after 7-days of exposure to 2% PG/VG and 2% PG/VG+nicotine. Blots were cropped from different parts of the same blot.**

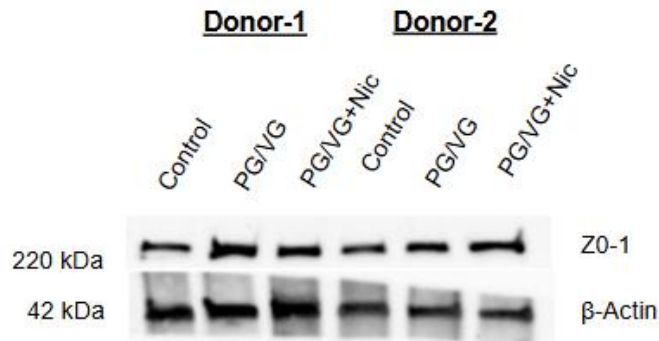

**Supplementary Figure 2. Protein expression of ZO-1 from two donors after 7-days of exposure to 2% PG/VG and 2% PG/VG+nicotine. Blots were cropped from different parts of the same blot**
