# Supplementary figures and images for: Propylene Glycol and Vegetable Glycerin E-cigarette Aerosols Disrupt Mucociliary Function and Cause Cytotoxicity in Human Airway Epithelium
Source: Research Square preprint supplement (doi:10.21203/rs.3.rs-7040096/v1), 2025-09-25

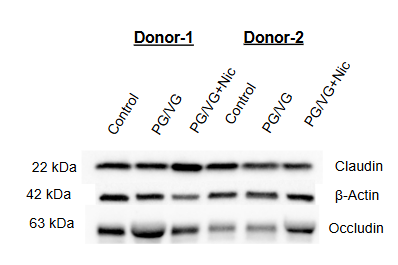


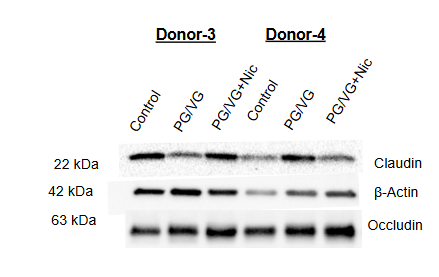


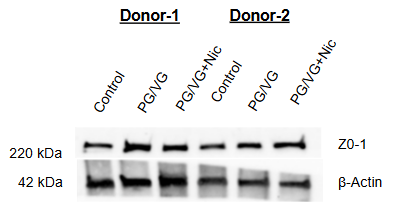

Supplement: Supplementary file 1 [file c9ea6bf0489a012ef9feea10.docx]
